# Supplementary material for: Archaeological Central American maize genomes suggest ancient gene flow from South America
Source: PubMed Central journal article supplement — Proc Natl Acad Sci U S A. 2020 Dec 14;117(52):33124–9. doi: 10.1073/pnas.2015560117 (PMC7777085; doi:10.1073/pnas.2015560117), 2020-12-14
Supplement: pnas.2015560117.sapp.pdf [file pnas.2015560117.sapp.pdf]

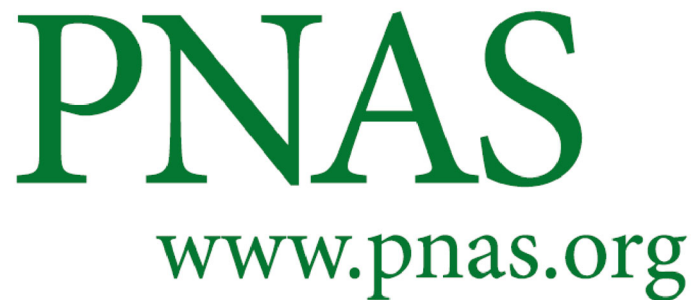

Supplementary Information for

## **Archaeological Central American Maize Genomes Suggest Ancient Gene Flow from South America**

Logan Kistler<sup>a\*</sup>, Heather B. Thakar<sup>b</sup>, Amber M. VanDerwarker<sup>c</sup>, Alejandra Domic<sup>d</sup>, Anders Bergström<sup>e</sup>, Richard J. George<sup>c</sup>, Thomas K. Harper<sup>d</sup>, Robin G. Allaby<sup>f</sup>, Kenneth Hirth<sup>d</sup>, Douglas J. Kennett<sup>c\*</sup>

<sup>a</sup>Department of Anthropology, Smithsonian Institution, Washington, DC, U.S.A.

<sup>b</sup>Department of Anthropology, Texas A&M University, College Station, TX 77843, U.S.A

<sup>c</sup>Department of Anthropology, University of California, Santa Barbara, CA 93106, U.S.A

<sup>d</sup>Department of Anthropology, The Pennsylvania State University, State College, PA 16802, U.S.A

<sup>e</sup>The Francis Crick Institute, London NW1 1AT, UK.

<sup>f</sup>School of Life Sciences, University of Warwick, Coventry, CV4 7AL, UK.

\*Logan Kistler, Douglas J. Kennett

**Email:** KistlerL@si.edu, kennett@anth.ucsb.edu

### **This PDF file includes:**

Figure S1

### **Other supplementary materials for this manuscript include the following:**

Dataset S1 (Excel file)

## 1 **Morphometric Permutation Analysis**

2  
3 We performed 100,000 random permutations to estimate the probability of the observed  
4 difference in each morphometric variable (Fig. S1). Each iteration of the test randomly  
5 reassigned values with replacement to maximize the number of independent  
6 simulations. The absolute difference between the simulated groups were calculated and  
7 each value was compiled to generate a sampling distribution. Permutation p-values  
8 were calculated using the proportion of the 100,000 simulations that were larger than  
9 the observed difference. All statistics and permutation test were performed using R (1).

## 10 **Radiocarbon Dating**

11  
12  
13 Each maize cob was subsampled for AMS  $^{14}\text{C}$  dating at in the Human Palaeoecology  
14 and Isotope Geochemistry Laboratory at the The Pennsylvania State University. Each  
15 Samples were then pretreated with repeated baths in 1M HCl and NaOH at 70 °C for  
16 30min on a heater block. A final acid wash removed secondary carbonates formed  
17 during the base treatment. Samples were then returned to neutral pH with two 15-min  
18 baths in deionized water at 70 °C to remove chlorides, and dried on a heater block.  
19 Sample  $\text{CO}_2$  was produced by combustion at 900 °C for 3 h in evacuated sealed quartz  
20 tubes using a CuO oxygen source and Ag wire to remove chloride compounds. Primary  
21 (OX-1) and secondary (FIRI-D/F, FIRI-H) standards and a Queets Wood background  
22 were selected to match the sample age and underwent the same chemical steps for  
23 quality assurance. Samples were graphitized at the Keck Carbon Cycle Accelerator  
24 Mass Spectrometer facility at the University of California, Irvine and AMS  $^{14}\text{C}$   
25 measurements were made using a modified NEC 1.5SDH-1 instrument; National  
26 Electrostatics Corporation. All  $^{14}\text{C}$  ages were  $\delta^{13}\text{C}$ -corrected for mass-dependent  
27 fractionation with measured  $^{13}\text{C}/^{12}\text{C}$  values (2) and calibrated using OxCal version 4.3  
28 (3) using the IntCal13 northern hemisphere curve (4).

## 29 **DNA extraction and genomic data collection**

30  
31 26 maize samples were prepared in the dedicated ancient DNA clean lab facilities at the  
32 Penn State Anthropology Department (n=23), and the Smithsonian Institution's Museum  
33 Support Center (n=3). Standard protocols to prevent and detect contamination were  
34 utilized (5), including strict workflow procedures, frequent cleaning with bleach and  
35 ethanol, use of complete personal protective equipment, and the preparation and  
36 sequencing of negative control reactions. Both labs are equipped with filtered air  
37 handling and are regularly decontaminated.

38 We extracted DNA, prepared sequencing libraries, and screened samples following  
39 established protocols for highly degraded ancient DNA (Supplemental Methods),  
40 identifying EG84, EG85, and EG90 as suitable for genomic sequencing.

41 DNA was extracted from archaeological maize cob (n=24), stem (n=1), and leaf (n=1)  
42 tissue exactly following the protocol described by Wales and Kistler (6). At Penn State,  
43 we prepared DNA sequencing libraries exactly as described in Kistler et al (7), and at  
44 the Smithsonian we employed the Blunt End Single Tube procedure (8) with

1 modifications described in (9), dual indexing with primers and primer sequences  
2 described in (10), and Platinum Taq High-Fidelity (Invitrogen) for library amplification.  
3 Samples were pooled in roughly equimolar ratios, and screened on a NextSeq 550  
4 High-output flow cell with 75bp single-end reads, and a HiSeq X10 lane with 150bp  
5 paired-end reads. Samples with sufficient endogenous DNA for genome-scale analyses  
6 were sequenced completely on a HiSeq X10. All sequencing was carried out at Admera  
7 Health, South Plainfield, NJ.

8 Sample reads were adapter-trimmed and paired reads were merged using  
9 AdapterRemoval 2 (11), and mapped to the maize reference genome (Zea mays B73  
10 RefGen\_v4; (12)) using the Burrowes-Wheeler Aligner *aln* function (13) with seed  
11 disabled to improve ancient DNA mapping (11) and a minimum mapping quality of 20.  
12 We used mapDamage 2.0 (14) to verify cytosine deamination profiles consistent with  
13 authentically ancient DNA, and all 5' thymine and 3' adenine residues were hard-  
14 masked within 5nt of sequence ends where deamination was most concentrated. All  
15 analyses were restricted to the strictly mappable fraction of the maize genome, as  
16 previously described (15); mappability mask previously published in (15).

17 Using the set of 17,672,809 SNPs described in (15), we generated pseudohaplotype  
18 SNP calls at all sites with a minimum 2x consensus, exactly as described previously  
19 (15). Using this approach we recovered 1,786,417, 3,312,860, and 2,243,175 SNPs  
20 from EG84, EG85, and EG90 respectively. In addition, we followed the approach of (16)  
21 and combined the three samples for most analyses, treating them as a single population  
22 sample. We merged the alignment files for the three samples, and re-called the SNP  
23 panel as a single set of pseudohaplotypes in this case, yielding 7,666,836 SNPs for  
24 analysis. We combined new SNP calls from El Gigante with the previously reported set  
25 of SNP calls available at (15), consisting of 109 modern genomes and 11 ancient  
26 genomes before culling for missingness during analyses. For analyses assuming SNPs  
27 in linkage equilibrium (e.g. model-based clustering), we pruned for linkage using the  
28 plink "--indep-pairwise" function. The complete SNP dataset including separate and  
29 combined El Gigante maize is available on Dryad.

30

## 31 **Genomic analyses**

32

### 33 *Model-based clustering*

34

35 We used ADMIXTURE (17) to estimate ancestry proportions under model-based  
36 clustering in maize genomes, excluding teosintes and the partially domesticated mid-  
37 Holocene genomes from Mexico (18, 19). We included all genomes with at least 25% of  
38 sites called, enforced a minimum 50% of samples called to retain a site, minimum minor  
39 allele frequency of 0.02, and using the LD-pruned SNP set. This analysis included  
40 4,252,422 SNPs and 98 genomes, using the combined El Gigante dataset and setting  
41  $k=5$  as previously established (7). We ran 100 independent analyses, and compared the  
42 results by final log-likelihood (lnL). lnL values were bimodal. The majority of runs, 72%,  
43 clustered tightly together with a higher lnL range, with the remaining 28% represented a  
44 more diffuse lower tier. Among the better supported upper tier, the El Gigante genome  
45 contains an estimated 97.73%–98.04% Pan-American ancestry, and 1.95–2.26% South

1 American ancestry. No other ancestry cluster contributes significantly (max 0.0016%) in  
2 any run. The small proportion of South American ancestry is attributed to the  
3 Andean/Pacific group. Given genetic and historical ties between this and the Lowland  
4 lineage (7), we interpret this as a generic signature for an ancestral South American  
5 gene pool.

### 6 7 *f-statistics*

8  
9 We used previously released scripts for *f4* and outgroup-*f3* calculations ((15)  
10 *plink2freq.pl*, *f3.pl*, *f4.pl*), and included the complete, unpruned dataset at all sites where  
11 the outgroup *Tripsacum dactyloides* was present. We used a block jackknife resampling  
12 procedure with 5Mb blocks to estimate standard error and calculate a Z-score to assess  
13 fit to the null hypothesis. Statistical significance for rejecting the null hypothesis was  
14 concluded where  $|Z| > 3$ .

### 15 16 *Ancestry informative marker (AIM) domestication analysis discovery*

17  
18 We used a perl script (Dryad: AIM.pl) to calculate ancestry informativeness ( $I_n$ ; (20)  
19 between pairs of populations at all SNPs called in at least half the samples from each  
20 group. Following previous research into maize domestication status (18), we designated  
21 all SNPs with  $I_n \geq 0.1$  as ancestry informative markers. For domestication analysis, we  
22 compared 1) all modern domesticated maize with  $\leq 20\%$  ancestry in the highland  
23 Central American cluster with 2) all *parviglumis* and *mexicana* genomes. Highland  
24 Central American maize carries previously documented admixture from highland  
25 *mexicana* teosinte (21), and thus all sites are not reliably maize-like for  $I_n$  determination.  
26 We assessed a panel of previously identified genes associated with domestication (22)  
27 containing at least 10 AIMs in the region containing the gene, plus 10kbp upstream and  
28 downstream, yielding 199 total genes. For each genome, we calculated the proportion  
29 of teosinte-like alleles in each domestication gene region with at least 5 called alleles at  
30 AIMs, as described above. The El Gigante set of proportions could then be compared  
31 against the set of comparable values for maize and teosinte as described in the maize  
32 text.

33  
34 To assess the domestication status of individual genes, we used a likelihood-based  
35 method to test whether alleles at AIMs for a given gene were more likely drawn from a  
36 population resembling modern maize or modern teosinte. We considered all AIMs in  
37 each domestication gene regions as above, and computed a gene's likelihood of  
38 originating from a reference population (maize or teosinte) on the basis of the sample  
39 allele's frequency in the reference population. Log-likelihood was therefore calculated  
40 as the sum of the natural log of the frequency of the test sample's alleles in a reference  
41 population:

$$42 \quad \ln L = \sum_i^{n_{AIMs}} \ln f(\text{allele})$$

43  
44 Where the test sample's allele was not present in the reference population, we set the  
45 allele frequency at a nominal 0.01 to preempt the log of 0, assuming that the test allele

1 could easily be unsampled or lost to drift. We then computed Bayes Factors (BF)  
2 following (23) as the ratio of lnL values for maize and teosinte. We concluded  
3 “substantial” evidence for one of the competing hypothesis when  $BF \geq 3$  or  $BF \leq 1/3$ ,  
4 and “strong” evidence when  $BF \geq 10$  or  $BF \leq 1/10$ , following (23).

5  
6 For visualization (Fig. 2), we normalized the log-likelihood ratios on a scale of -1 to 1 as:

$$\frac{\ln L_{maize} - \ln L_{teosinte}}{\ln L_{maize} + \ln L_{teosinte}}$$

### 11 *AIM analysis for South American affinity*

12  
13 For South American affinity AIM analysis, we compared 1) modern domesticated maize  
14 with  $\geq 95\%$  combined Andean/Pacific and Lowland South American ancestry with 2)  
15 modern domesticated maize having  $\leq 5\%$  combined Andean/Pacific and Lowland South  
16 American ancestry, and computed  $I_n$  to identify AIMS as above. We then assessed  
17 affinity to South American ancestry by computing the proportion of these geographic  
18 AIMS carrying South American alleles in each individual sample.

### 21 *Admixture graph fitting*

22  
23 We included all samples with Pan-American or South American ancestry ( $\geq 99\%$  on the  
24 basis of model-based clustering), plus El Gigante maize, all *parviglumis*, and *Tripsacum*  
25 *dactyloides* for an outgroup. We divided the Pan-American lineage into northern and  
26 southern geographic sets across the Isthmus of Panama, yielding 6 total populations.  
27 We first used AdmixTools (24) to calculate all permutations of  $f_4$ -statistics as input for  
28 AdmixtureGraph (25), which we used to explore the permutation space of graphs. We  
29 first exhaustively enumerated all 3885 possible graphs relating these 6 populations with  
30 up to one admixture event, and fitted each of these to the  $f_4$ -statistics. Each graph was  
31 fit five times, retaining the best scoring fit (as evaluated using the “best\_error” score).  
32 None of the graphs without any admixture events provided good fits. Among those with  
33 one admixture event, two graphs provided decent fits to the data, each with four minor  
34 outlier  $f_4$ -statistics (after these, the next best graph had nine outliers). The first of these  
35 was the topology (*Tripsacum*,(*parviglumis*,(South America,(El Gigante,(Pan-Am  
36 North,Pan-Am South)))))) as shown in Figure 3a, with an admixture event from the  
37 ancestor of the South America lineage into Pan-Am South lineage. The second had the  
38 same structure, but with the admixture instead from the Pan-Am South lineage into the  
39 South American lineage. These two topologies are equivalent with respect to the  $f_4$ -  
40 statistics and thus achieved identical fits.

41  
42 We then took the first of these graphs, studied the four outlier statistics that it did not  
43 perfectly predict, and hypothesized a second admixture event from the *parviglumis*  
44 lineage into the lineage ancestral to El Gigante, Pan-Am North and Pan-Am South. This  
45 improved the fit and left only one minor outlier statistic ( $|Z|=3.3$ ), though the inferred

1 admixture proportions were not stable across repeated fits. We then refitted this graph  
2 using qpGraph (24), which uses  $f_2$  and  $f_3$ -statistics in addition to  $f_4$ -statistics, obtaining  
3 stable admixture proportions and achieving a good fit without any outlier  $f$ -statistics  
4 (largest  $|Z| = 2.7$ ).

### 6 *Genome Size Estimation*

8 Heterochromatic knob content is the primary determinant of genome size differences in  
9 maize, and the proportion of sequence reads mappable to heterochromatic knobs has  
10 been demonstrated to reflect genome size estimates from flow cytometry (26, 27). We  
11 therefore used the proportion of reads mapping to the 180bp knob fraction of the maize  
12 genome as a proxy for genome size, following (26). We used a custom mapping  
13 strategy modeled after (28) to independently map sequence reads using a method  
14 capable of assigning reads to highly repetitive transposable element and  
15 heterochromatic knob fractions of the genome. We first generated a unique  
16 transposable element (UTE) and heterochromatic knob (knobC) reference set exactly  
17 as described in (28, 29) (reference fasta files curated on Dryad), and obtained the  
18 maize filtered gene set version ZmB73\_5b\_FGS\_genes.fasta from (ftp.gramene.org).  
19 We created SMALT (<https://www.sanger.ac.uk/tool/smalt-0/>) indexes from these three  
20 reference targets with a step size of 3 and a word length of 12. We then used SMALT to  
21 first attempt mapping to the knobC set, then passed remaining unmapped reads to the  
22 UTE. Elements of the FGS also occur in the UTE, and therefore reads were treated as  
23 transposable rather than genic in origin if they could be assigned to the UTE, regardless  
24 of gene occupancy. Finally, only reads failing to map to both repetitive databases were  
25 handed down to the FGS for genic read alignment.

27 The proportion of all mapped reads assigned to the 180bp knob elements of the knobC  
28 fraction was summarized in terms of *RPKM*—reads per kilobase (following (29) and  
29 used for genome size analysis. In this case,  $RPKM_{180bp} = R/(K \times M \times 10^{-6})$ , where  $R$  is  
30 the number of reads mapped to 180bp knob elements in the knobC database,  $K$  is the  
31 combined length of the 180bp knob elements in the knobC database, and  $M$  is the total  
32 number of reads mapped to the combined knobC, UTE, and FGS genomic fractions—  
33 the complete mappable set of reads. Because of sequence-based and genomic biases  
34 in ancient DNA degradation (30), including specifically in maize (18), we did not attempt  
35 genome size estimation in archaeological maize.

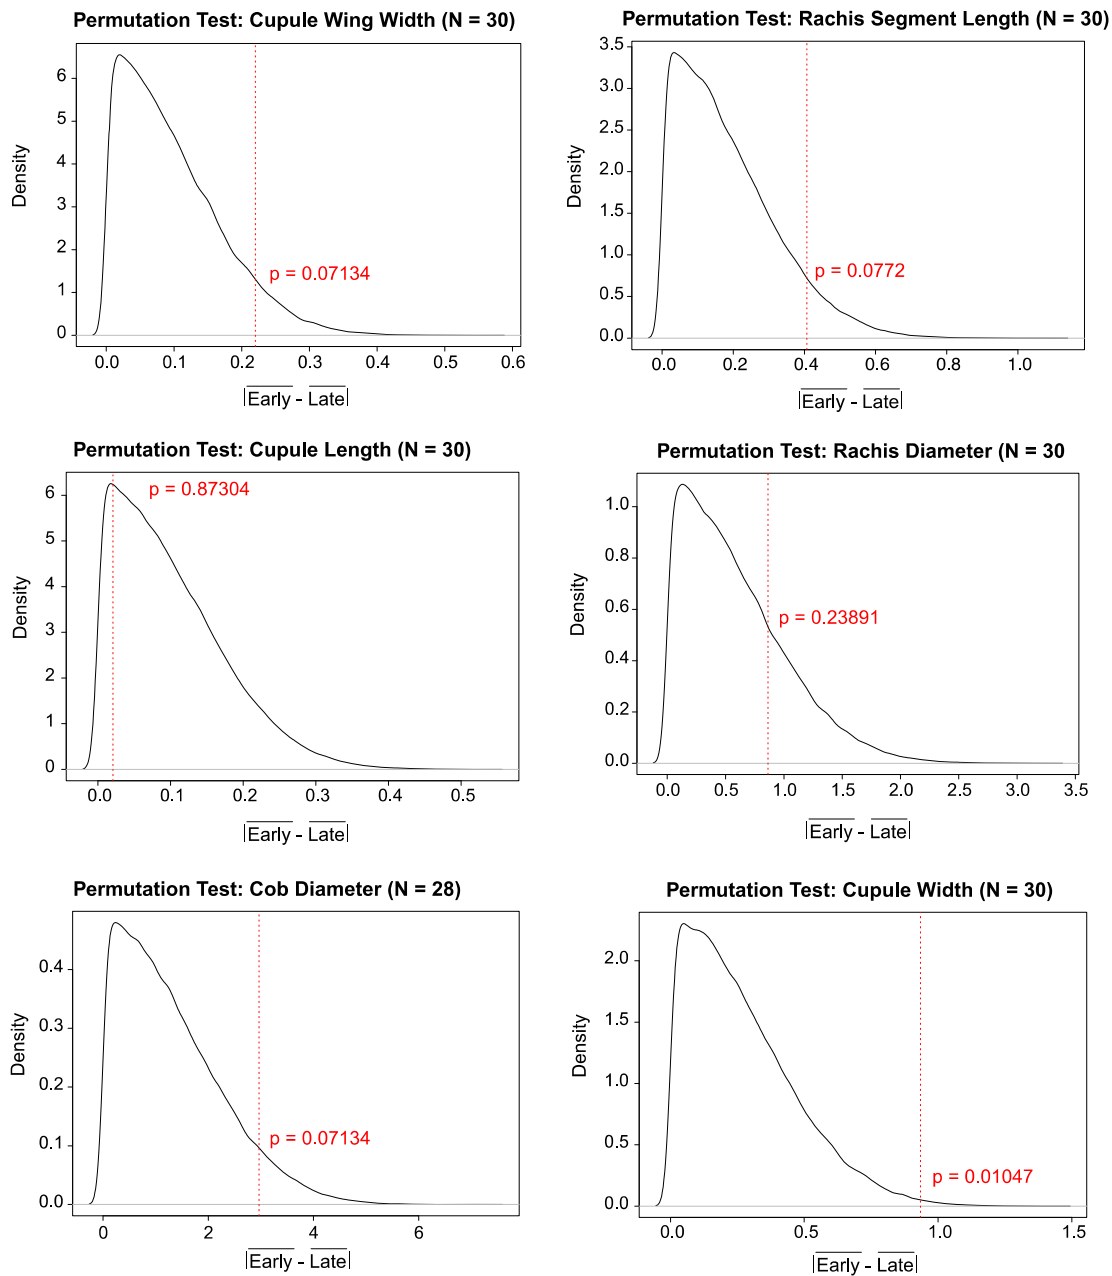

1  
2 **Supplemental Fig. S1.** Permutation analysis using morphometric variables of Early (4,340-4020 cal. BP)  
3 and Late (2,300-1,900 cal. BP). Permutation tests were performed using 100,000 random iteration to  
4 estimate the probability of the observed difference in each morphometric variable. Each iteration of the  
5 test randomly reassigned values with replacement to maximize the number of independent simulations.  
6 The absolute difference between the simulated groups were calculated and each value was compiled to  
7 generate a sampling distribution. Permutation p-values were calculated using the proportion of the  
8 100,000 simulations that were larger than the observed difference. Three maize samples with dates after  
9 1900 BP were exclude in the tests.

10  
11  
12  
13

## References

1. R CORE TEAM, R: a language and environment for statistical computing. 2020 (2020).
2. M. Stuiver, H. A. Polach, Discussion reporting of 14C data. *Radiocarbon* **19**, 355–363 (1977).
3. C. B. Ramsey, Methods for summarizing radiocarbon datasets. *Radiocarbon* **59**, 1809–1833 (2017).
4. P. J. Reimer, *et al.*, IntCal13 and Marine13 radiocarbon age calibration curves 0–50,000 years cal BP. *Radiocarbon* **55**, 1869–1887 (2013).
5. T. L. Fulton, B. Shapiro, “Setting up an ancient DNA laboratory” in *Ancient DNA, Methods in Molecular Biology.*, B. Shapiro, *et al.*, Eds. (Springer New York, 2019), pp. 1–13.
6. N. Wales, L. Kistler, “Extraction of ancient DNA from plant remains” in *Ancient DNA*, (Humana Press, 2019).
7. L. Kistler, *et al.*, Multiproxy evidence highlights a complex evolutionary legacy of maize in South America. *Science* **362**, 1309–1313 (2018).
8. C. Carøe, *et al.*, Single-tube library preparation for degraded DNA. *Methods Ecol. Evol.* **9**, 410–419 (2018).
9. S. S. T. Mak, *et al.*, Comparative performance of the BGISEQ-500 vs Illumina HiSeq2500 sequencing platforms for palaeogenomic sequencing. *GigaScience* **6** (2017).
10. M. Meyer, M. Kircher, Illumina sequencing library preparation for highly multiplexed target capture and sequencing. *Cold Spring Harbor Protocols* **2010**, pdb.prot5448-pdb.prot5448 (2010).
11. M. Schubert, S. Lindgreen, L. Orlando, AdapterRemoval v2: rapid adapter trimming, identification, and read merging. *BMC Res. Notes* **9**, 88 (2016).
12. Y. Jiao, *et al.*, Improved maize reference genome with single-molecule technologies. *Nature* **546**, 524–527 (2017).
13. H. Li, R. Durbin, Fast and accurate short read alignment with Burrows-Wheeler transform. *Bioinformatics* **25**, 1754–1760 (2009).
14. H. Jónsson, A. Ginolhac, M. Schubert, P. L. F. Johnson, L. Orlando, mapDamage2.0: fast approximate Bayesian estimates of ancient DNA damage parameters. *Bioinformatics* **29**, 1682–1684 (2013).



15. L. Kistler, *et al.*, Data from: Multi-proxy evidence highlights a complex evolutionary legacy of maize in South America. *Dryad*, Dataset 10.5061/dryad.70t85k2.
16. R. R. da Fonseca, *et al.*, The origin and evolution of maize in the Southwestern United States. *Nature Plants* **1**, 14003 (2015).
17. D. H. Alexander, J. Novembre, K. Lange, Fast model-based estimation of ancestry in unrelated individuals. *Genome Res.* **19**, 1655–1664 (2009).
18. J. Ramos-Madrigal, *et al.*, Genome sequence of a 5,310-year-old maize cob provides insights into the early stages of maize domestication. *Curr. Biol.* **26**, 3195–3201 (2016).
19. M. Vallebuena-Estrada, *et al.*, The earliest maize from San Marcos Tehuacán is a partial domesticate with genomic evidence of inbreeding. *Proc. Natl. Acad. Sci. U.S.A.* **113**, 14151–14156 (2016).
20. N. A. Rosenberg, L. M. Li, R. Ward, J. K. Pritchard, Informativeness of genetic markers for inference of ancestry. *Am. J. Hum. Genet.* **73**, 1402–1422 (2003).
21. J. van Heerwaarden, M. B. Hufford, J. Ross-Ibarra, Historical genomics of North American maize. *Proc. Natl. Acad. Sci. U.S.A.* **109**, 12420–12425 (2012).
22. M. B. Hufford, *et al.*, Comparative population genomics of maize domestication and improvement. *Nat. Genet.* **44**, 808–811 (2012).
23. A. F. Jarosz, J. Wiley, What are the odds? A practical guide to computing and reporting Bayes factors. *J. Problem Solving* **7** (2014).
24. N. Patterson, *et al.*, Ancient admixture in human history. *Genetics* **192**, 1065–1093 (2012).
25. K. Leppälä, S. V. Nielsen, T. Mailund, admixturegraph: an R package for admixture graph manipulation and fitting. *Bioinformatics* **33**, 1738–1740 (2017).
26. Y. Jian, *et al.*, Maize (*Zea mays* L.) genome size indicated by 180-bp knob abundance is associated with flowering time. *Sci. Rep.* **7**, 5954 (2017).
27. J.-M. Chia, *et al.*, Maize HapMap2 identifies extant variation from a genome in flux. *Nat. Genet.* **44**, 803–807 (2012).
28. C. M. Diez, E. Meca, M. I. Tenailon, B. S. Gaut, Three groups of transposable elements with contrasting copy number dynamics and host responses in the maize (*Zea mays* ssp. *mays*) genome. *PLoS Genet.* **10**, e1004298 (2014).
29. M. I. Tenailon, M. B. Hufford, B. S. Gaut, J. Ross-Ibarra, Genome size and transposable element content as determined by high-throughput sequencing in maize and *Zea luxurians*. *Genome Biol. Evol.* **3**, 219–229 (2011).

30. L. Kistler, R. Ware, O. Smith, M. Collins, R. G. Allaby, A new model for ancient DNA decay based on paleogenomic meta-analysis. *Nucleic Acids Res.* **45**, 6310–6320 (2017).

### **Dataset S1 Legend**

Sample details for previously published modern maize and teosinte genomes included in analyses, including data source, SRA accession numbers, 180bp knob RPKM, location details, and inferred ancestry proportions.
